# Supplementary material for: Assessment of Protocol Impact on Subjectivity Uncertainty When Analyzing Peripheral Blood Mononuclear Cell Flow Cytometry Data Files
Source: MDPI journal article supplement (doi:10.3390/mps4020024), 2021-03-30
Supplement: s1 [file s1]

The following diagram workflow shows how to calculate measurement uncertainty, as detailed in the Guide to Expression of Uncertainty in Measurement [1] [28], with an example of how uncertainty was calculated within this research paper. This shows how different sources can be identified and combined to create a more confidence expression of uncertainty of a measurement.

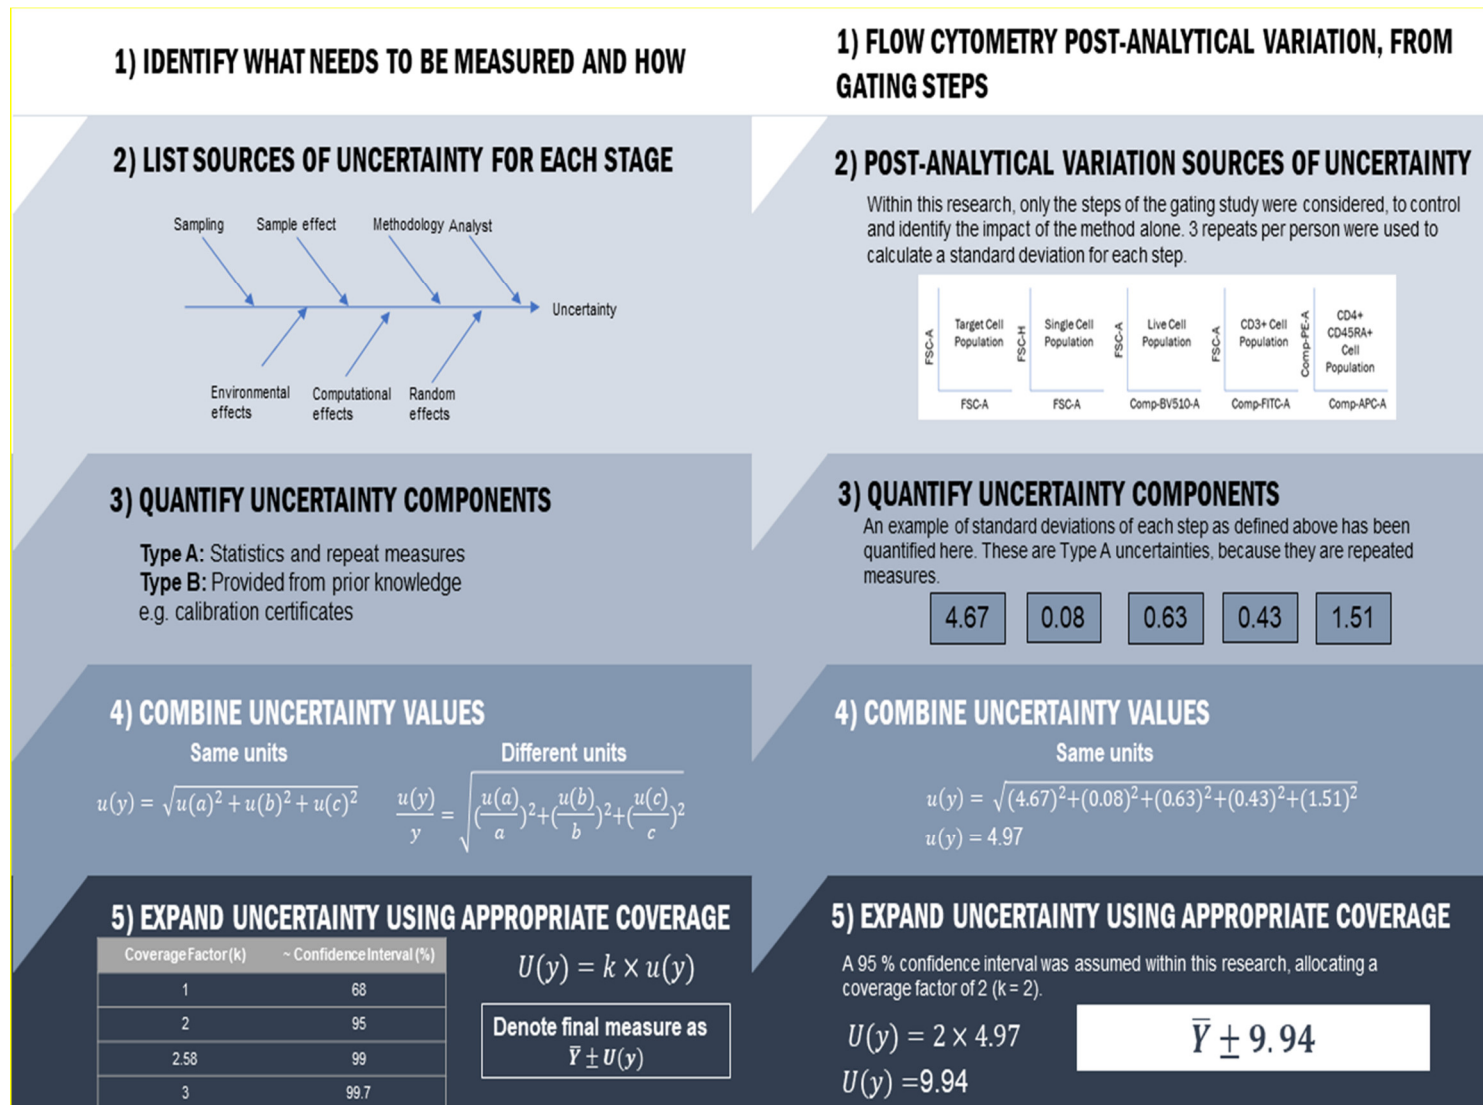

**Figure S1.** Process flow of calculating measurement uncertainty, with a Flow Cytometry gating exemplar provided for illustration in this context.

## Reference

1. Lequin, R.M. Guide to the expression of uncertainty of measurement: Point/counterpoint. *Clin. Chem.* **2004**, *50*, 977–978, doi:10.1373/clinchem.2003.030528.
